# Supplementary material for: Free-standing nickel oxide nanoflake arrays: synthesis and application for highly sensitive non-enzymatic glucose sensors
Source: Royal Society of Chemistry journal article supplement (doi:10.1039/c2nr30302g), 2012-01-01
Supplement: c2nr30302g.pdf [file c2nr30302g.pdf]

# Supporting Information

## Free-Standing Nickel Oxide Nanoflake Arrays: Synthesis and Application for Highly Sensitive Non-enzymatic Glucose Sensors

*Gongming Wang,<sup>a</sup> Xihong Lu,<sup>a,b</sup> Teng Zhai,<sup>b</sup> Yichuan Ling,<sup>a</sup> Hanyu Wang,<sup>a</sup> Yexiang Tong,<sup>b</sup>  
and Yat Li <sup>\*a</sup>*

*<sup>a</sup> Department of Chemistry and Biochemistry, University of California, Santa Cruz,  
California 95064 United States*

*<sup>b</sup> KLGHEI of Environment and Energy Chemistry, MOE of the Key Laboratory of  
Bioinorganic and Synthetic Chemistry, School of Chemistry and Chemical Engineering, Sun  
Yat-Sen University, Guangzhou 510275, People's Republic of China*

\*Corresponding Author. E-mail: [yli@chemistry.ucsc.edu](mailto:yli@chemistry.ucsc.edu)

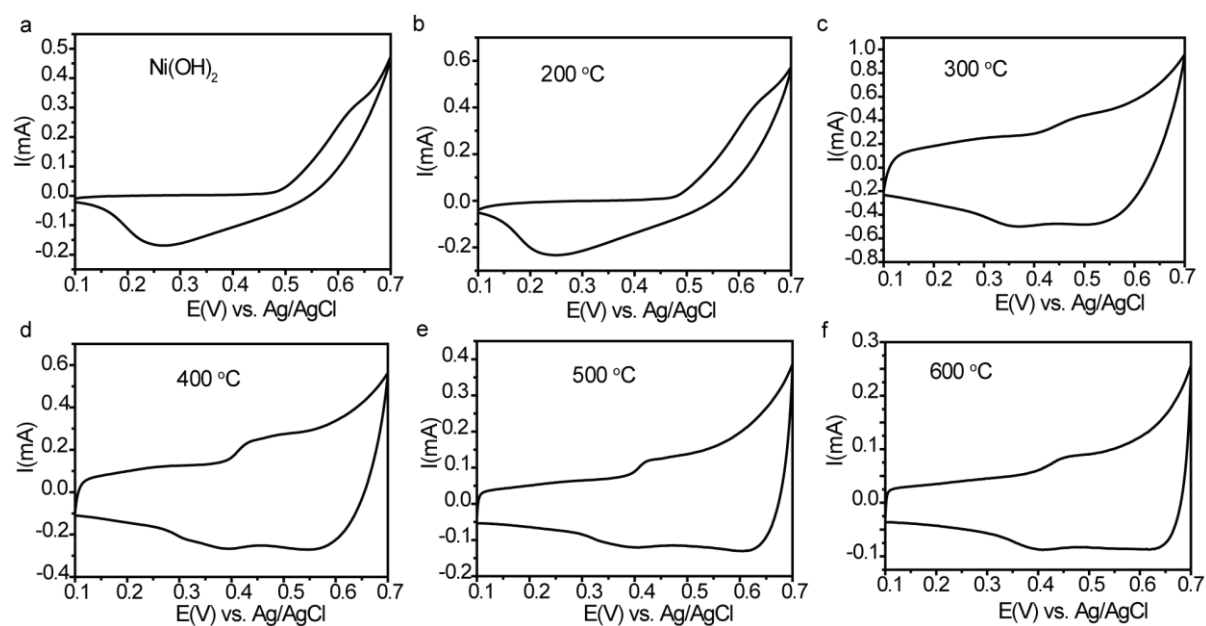

**Figure S1.** Cyclic voltammetric curves collected for (a) as-prepared  $\text{Ni(OH)}_2$ , and  $\text{Ni(OH)}_2$  annealed in air at (b) 200 °C, (c) 300 °C, (d) 400 °C, (e) 500 °C and (f) 600 °C, in 0.1 M NaOH aqueous solution at a scan rate of 20 mV/s.

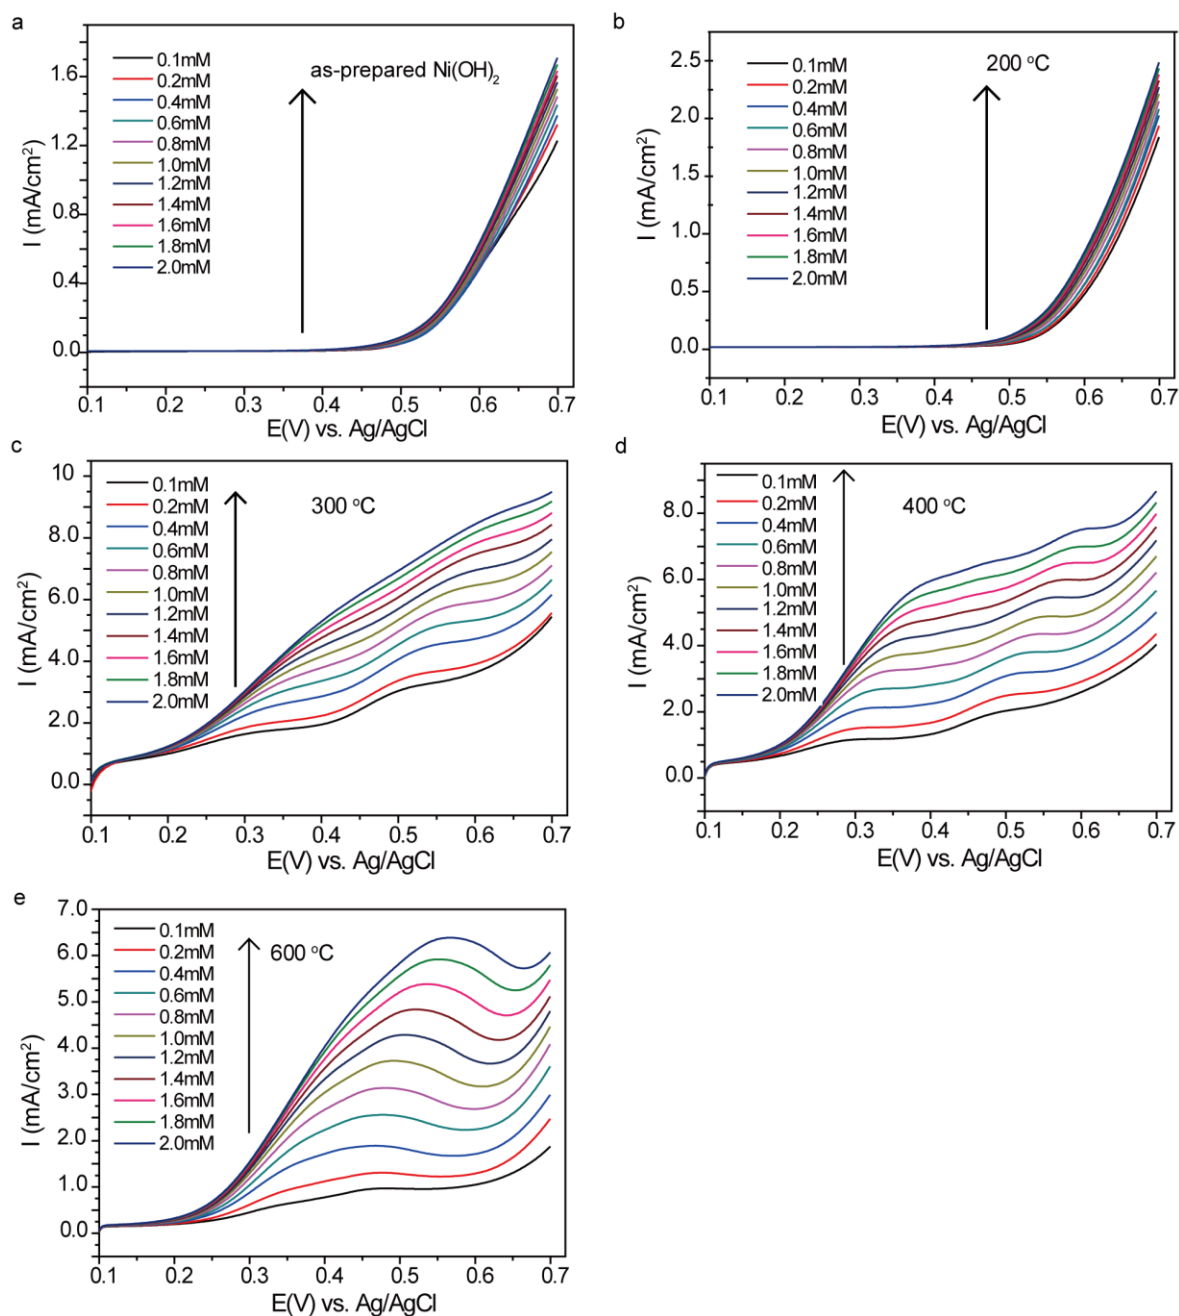

**Figure S2.** Linear sweep voltammograms of (a) as-prepared Ni(OH)<sub>2</sub> nanoflakes and Ni(OH)<sub>2</sub> nanoflakes annealed in air at (b) 200 °C, (c) 300 °C, (d) 400 °C and (e) 600 °C collected in a 0.1 M NaOH solution with a glucose concentrations from 0.1 mM to 2.0 mM at a scan rate of 20 mV/s.

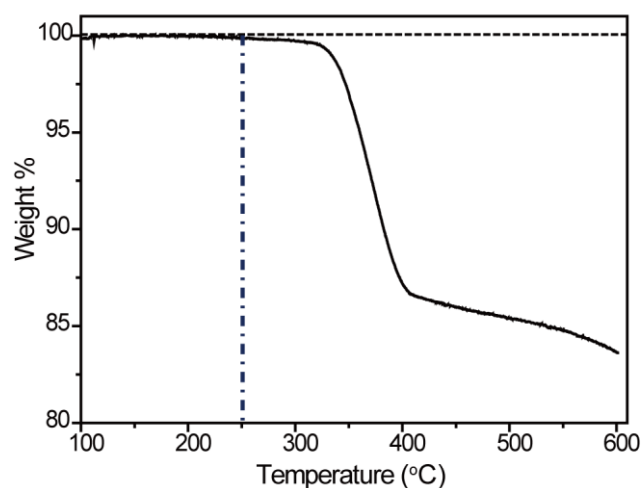

**Figure S3.** Thermogravimetric (TGA) curve of  $\text{Ni}(\text{OH})_2$  nanoflake arrays (in powder form) collected from FTO substrate.

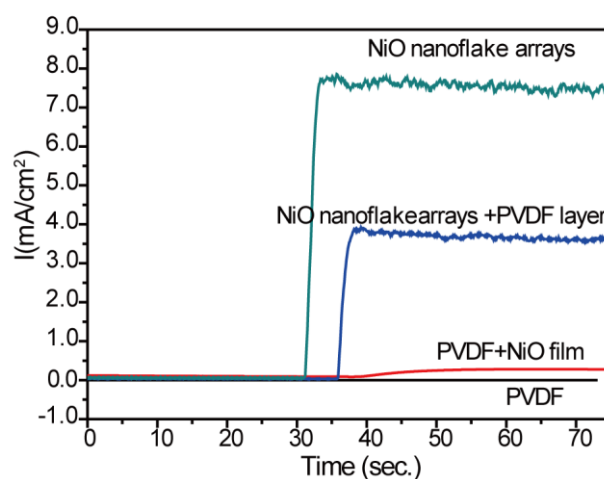

**Figure S4.** Amperometric response to the addition of 1 mM glucose into a 0.1M NaOH aqueous solution at 0.5 V vs. Ag/AgCl, collected for four different samples: 1) NiO nanoflake arrays; 2) NiO nanoflake arrays spin coated with a layer of PVDF polymer; 3) PVDF layer on FTO glass; and 4) NiO powder mixed with PVDF and pasted onto FTO glass.
